# Supplementary material for: Dedicated comparatives aid comparisons of magnitude: a study with Pitjantjatjara-English bilinguals
Source: Front Hum Neurosci. 2024 Sep 13;18:1418797. doi: 10.3389/fnhum.2024.1418797 (PMC11428649; doi:10.3389/fnhum.2024.1418797)
Supplement: Supplementary file 1 [file Table_1.XLSX]

## Sheet: Readme
This data file contains the data used for
Greenacre, Defina, Akbar & Garcia. 2024. Dedicated comparatives aid comparisons of magnitude: A study with Pitjantjara-English bilinguals
Any questions can be addressed to Rebecca Defina rebecca.defina@unimelb.edu.au
This file contains four sheets. Two for each task (Quantity & Extent) and two for each measure (whether the response was correct and the reaction time)
Each file has the following columns
language	trial	trial_full	participant_ID	choice/RT	LeftComparatorinPair	RightComparatorinPair	LowestinPair	AbsDifferenceInPair	Ratio_AbsDiffDividedByLowest
This is the language used in the experiment (English or Pitjantjatjara)	The number of the trial item within the experiment	An id number for the trial item	An id number for each participant	This is the measure: In the choice column 1 = correct, 0 = incorrect; In the RT column this is a value in milliseconds	This is the quantity/extent of the left comparator	This is the quantity/extent of the right comparator	This is the smallest quantity/extent of the pair	The absolute difference between the two comparators	The ratio of the absolute difference to the lowest value in the pair

## Sheet: Quantity-correct
language	trial	trial_full	participant_ID	choice	LeftComparatorinPair	RightComparatorinPair	LowestinPair	AbsDifferenceInPair	Ratio_AbsDiffDividedByLowest
Pitjantjatjara	1	1	1	1	2	3	2	1	0.5
Pitjantjatjara	1	1	2	1	2	3	2	1	0.5
Pitjantjatjara	1	1	5	0	2	3	2	1	0.5
Pitjantjatjara	1	1	6	1	2	3	2	1	0.5
Pitjantjatjara	1	1	7	1	2	3	2	1	0.5
Pitjantjatjara	1	1	10	1	2	3	2	1	0.5
Pitjantjatjara	1	1	12	1	2	3	2	1	0.5
Pitjantjatjara	1	1	13	1	2	3	2	1	0.5
Pitjantjatjara	1	1	16	1	2	3	2	1	0.5
Pitjantjatjara	1	1	17	1	2	3	2	1	0.5
Pitjantjatjara	1	1	18	1	2	3	2	1	0.5
Pitjantjatjara	1	1	19	1	2	3	2	1	0.5
Pitjantjatjara	1	1	20	1	2	3	2	1	0.5
Pitjantjatjara	1	1	23	1	2	3	2	1	0.5
Pitjantjatjara	1	1	25	1	2	3	2	1	0.5
Pitjantjatjara	1	1	26	0	2	3	2	1	0.5
Eng	1	1	1	1	2	3	2	1	0.5
Eng	1	1	2	1	2	3	2	1	0.5
Eng	1	1	5	1	2	3	2	1	0.5
Eng	1	1	6	1	2	3	2	1	0.5
Eng	1	1	7	1	2	3	2	1	0.5
Eng	1	1	10	1	2	3	2	1	0.5
Eng	1	1	12	1	2	3	2	1	0.5
Eng	1	1	13	1	2	3	2	1	0.5
Eng	1	1	16	1	2	3	2	1	0.5
Eng	1	1	17	1	2	3	2	1	0.5
Eng	1	1	18	1	2	3	2	1	0.5
Eng	1	1	19	1	2	3	2	1	0.5
Eng	1	1	20	1	2	3	2	1	0.5
Eng	1	1	23	1	2	3	2	1	0.5
Eng	1	1	25	1	2	3	2	1	0.5
Eng	1	1	26	1	2	3	2	1	0.5
Pitjantjatjara	2	2	1	1	5	6	5	1	0.2
Pitjantjatjara	2	2	2	1	5	6	5	1	0.2
Pitjantjatjara	2	2	5	0	5	6	5	1	0.2
Pitjantjatjara	2	2	6	1	5	6	5	1	0.2
Pitjantjatjara	2	2	7	1	5	6	5	1	0.2
Pitjantjatjara	2	2	10	1	5	6	5	1	0.2
Pitjantjatjara	2	2	12	1	5	6	5	1	0.2
Pitjantjatjara	2	2	13	1	5	6	5	1	0.2
Pitjantjatjara	2	2	16	1	5	6	5	1	0.2
Pitjantjatjara	2	2	17	1	5	6	5	1	0.2
Pitjantjatjara	2	2	18	0	5	6	5	1	0.2
Pitjantjatjara	2	2	19	1	5	6	5	1	0.2
Pitjantjatjara	2	2	20	1	5	6	5	1	0.2
Pitjantjatjara	2	2	23	1	5	6	5	1	0.2
Pitjantjatjara	2	2	25	1	5	6	5	1	0.2
Pitjantjatjara	2	2	26	0	5	6	5	1	0.2
Eng	2	2	1	1	5	6	5	1	0.2
Eng	2	2	2	1	5	6	5	1	0.2
Eng	2	2	5	1	5	6	5	1	0.2
Eng	2	2	6	1	5	6	5	1	0.2
Eng	2	2	7	1	5	6	5	1	0.2
Eng	2	2	10	1	5	6	5	1	0.2
Eng	2	2	12	1	5	6	5	1	0.2
Eng	2	2	13	1	5	6	5	1	0.2
Eng	2	2	16	1	5	6	5	1	0.2
Eng	2	2	17	1	5	6	5	1	0.2
Eng	2	2	18	1	5	6	5	1	0.2
Eng	2	2	19	1	5	6	5	1	0.2
Eng	2	2	20	1	5	6	5	1	0.2
Eng	2	2	23	1	5	6	5	1	0.2
Eng	2	2	25	1	5	6	5	1	0.2
Eng	2	2	26	1	5	6	5	1	0.2
Pitjantjatjara	3	3	1	1	8	9	8	1	0.125
Pitjantjatjara	3	3	2	1	8	9	8	1	0.125
Pitjantjatjara	3	3	5	0	8	9	8	1	0.125
Pitjantjatjara	3	3	6	1	8	9	8	1	0.125
Pitjantjatjara	3	3	7	1	8	9	8	1	0.125
Pitjantjatjara	3	3	10	1	8	9	8	1	0.125
Pitjantjatjara	3	3	12	1	8	9	8	1	0.125
Pitjantjatjara	3	3	13	1	8	9	8	1	0.125
Pitjantjatjara	3	3	16	1	8	9	8	1	0.125
Pitjantjatjara	3	3	17	1	8	9	8	1	0.125
Pitjantjatjara	3	3	18	0	8	9	8	1	0.125
Pitjantjatjara	3	3	19	1	8	9	8	1	0.125
Pitjantjatjara	3	3	20	1	8	9	8	1	0.125
Pitjantjatjara	3	3	23	1	8	9	8	1	0.125
Pitjantjatjara	3	3	25	1	8	9	8	1	0.125
Pitjantjatjara	3	3	26	0	8	9	8	1	0.125
Eng	3	3	1	1	8	9	8	1	0.125
Eng	3	3	2	1	8	9	8	1	0.125
Eng	3	3	5	1	8	9	8	1	0.125
Eng	3	3	6	1	8	9	8	1	0.125
Eng	3	3	7	1	8	9	8	1	0.125
Eng	3	3	10	1	8	9	8	1	0.125
Eng	3	3	12	1	8	9	8	1	0.125
Eng	3	3	13	1	8	9	8	1	0.125
Eng	3	3	16	0	8	9	8	1	0.125
Eng	3	3	17	1	8	9	8	1	0.125
Eng	3	3	18	1	8	9	8	1	0.125
Eng	3	3	19	1	8	9	8	1	0.125
Eng	3	3	20	1	8	9	8	1	0.125
Eng	3	3	23	1	8	9	8	1	0.125
Eng	3	3	25	1	8	9	8	1	0.125
Eng	3	3	26	1	8	9	8	1	0.125
Pitjantjatjara	4	4	1	1	2	4	2	2	1
Pitjantjatjara	4	4	2	0	2	4	2	2	1
Pitjantjatjara	4	4	5	0	2	4	2	2	1
Pitjantjatjara	4	4	6	1	2	4	2	2	1
Pitjantjatjara	4	4	7	1	2	4	2	2	1
Pitjantjatjara	4	4	10	1	2	4	2	2	1
Pitjantjatjara	4	4	12	1	2	4	2	2	1
Pitjantjatjara	4	4	13	1	2	4	2	2	1
Pitjantjatjara	4	4	16	1	2	4	2	2	1
Pitjantjatjara	4	4	17	1	2	4	2	2	1
Pitjantjatjara	4	4	18	0	2	4	2	2	1
Pitjantjatjara	4	4	19	1	2	4	2	2	1
Pitjantjatjara	4	4	20	1	2	4	2	2	1
Pitjantjatjara	4	4	23	1	2	4	2	2	1
Pitjantjatjara	4	4	25	1	2	4	2	2	1
Pitjantjatjara	4	4	26	1	2	4	2	2	1
Eng	4	4	1	1	2	4	2	2	1
Eng	4	4	2	1	2	4	2	2	1
Eng	4	4	5	0	2	4	2	2	1
Eng	4	4	6	1	2	4	2	2	1
Eng	4	4	7	1	2	4	2	2	1
Eng	4	4	10	1	2	4	2	2	1
Eng	4	4	12	1	2	4	2	2	1
Eng	4	4	13	1	2	4	2	2	1
Eng	4	4	16	1	2	4	2	2	1
Eng	4	4	17	1	2	4	2	2	1
Eng	4	4	18	1	2	4	2	2	1
Eng	4	4	19	1	2	4	2	2	1
Eng	4	4	20	1	2	4	2	2	1
Eng	4	4	23	1	2	4	2	2	1
Eng	4	4	25	1	2	4	2	2	1
Eng	4	4	26	1	2	4	2	2	1
Pitjantjatjara	5	5	1	1	7	9	7	2	0.285714
Pitjantjatjara	5	5	2	1	7	9	7	2	0.285714
Pitjantjatjara	5	5	5	0	7	9	7	2	0.285714
Pitjantjatjara	5	5	6	1	7	9	7	2	0.285714
Pitjantjatjara	5	5	7	1	7	9	7	2	0.285714
Pitjantjatjara	5	5	10	1	7	9	7	2	0.285714
Pitjantjatjara	5	5	12	1	7	9	7	2	0.285714
Pitjantjatjara	5	5	13	1	7	9	7	2	0.285714
Pitjantjatjara	5	5	16	1	7	9	7	2	0.285714
Pitjantjatjara	5	5	17	1	7	9	7	2	0.285714
Pitjantjatjara	5	5	18	0	7	9	7	2	0.285714
Pitjantjatjara	5	5	19	1	7	9	7	2	0.285714
Pitjantjatjara	5	5	20	1	7	9	7	2	0.285714
Pitjantjatjara	5	5	23	1	7	9	7	2	0.285714
Pitjantjatjara	5	5	25	1	7	9	7	2	0.285714
Pitjantjatjara	5	5	26	1	7	9	7	2	0.285714
Eng	5	5	1	1	7	9	7	2	0.285714
Eng	5	5	2	1	7	9	7	2	0.285714
Eng	5	5	5	0	7	9	7	2	0.285714
Eng	5	5	6	1	7	9	7	2	0.285714
Eng	5	5	7	1	7	9	7	2	0.285714
Eng	5	5	10	1	7	9	7	2	0.285714
Eng	5	5	12	1	7	9	7	2	0.285714
Eng	5	5	13	1	7	9	7	2	0.285714
Eng	5	5	16	1	7	9	7	2	0.285714
Eng	5	5	17	1	7	9	7	2	0.285714
Eng	5	5	18	1	7	9	7	2	0.285714
Eng	5	5	19	1	7	9	7	2	0.285714
Eng	5	5	20	1	7	9	7	2	0.285714
Eng	5	5	23	1	7	9	7	2	0.285714
Eng	5	5	25	1	7	9	7	2	0.285714
Eng	5	5	26	1	7	9	7	2	0.285714
Pitjantjatjara	1	6	1	1	3	2	2	1	0.5
Pitjantjatjara	1	6	2	1	3	2	2	1	0.5
Pitjantjatjara	1	6	5	1	3	2	2	1	0.5
Pitjantjatjara	1	6	6	0	3	2	2	1	0.5
Pitjantjatjara	1	6	7	1	3	2	2	1	0.5
Pitjantjatjara	1	6	10	1	3	2	2	1	0.5
Pitjantjatjara	1	6	12	1	3	2	2	1	0.5
Pitjantjatjara	1	6	13	1	3	2	2	1	0.5
Pitjantjatjara	1	6	16	1	3	2	2	1	0.5
Pitjantjatjara	1	6	17	1	3	2	2	1	0.5
Pitjantjatjara	1	6	18	1	3	2	2	1	0.5
Pitjantjatjara	1	6	19	1	3	2	2	1	0.5
Pitjantjatjara	1	6	20	1	3	2	2	1	0.5
Pitjantjatjara	1	6	23	1	3	2	2	1	0.5
Pitjantjatjara	1	6	25	1	3	2	2	1	0.5
Pitjantjatjara	1	6	26	1	3	2	2	1	0.5
Eng	1	6	1	1	3	2	2	1	0.5
Eng	1	6	2	1	3	2	2	1	0.5
Eng	1	6	5	0	3	2	2	1	0.5
Eng	1	6	6	1	3	2	2	1	0.5
Eng	1	6	7	1	3	2	2	1	0.5
Eng	1	6	10	1	3	2	2	1	0.5
Eng	1	6	12	1	3	2	2	1	0.5
Eng	1	6	13	1	3	2	2	1	0.5
Eng	1	6	16	1	3	2	2	1	0.5
Eng	1	6	17	1	3	2	2	1	0.5
Eng	1	6	18	1	3	2	2	1	0.5
Eng	1	6	19	1	3	2	2	1	0.5
Eng	1	6	20	1	3	2	2	1	0.5
Eng	1	6	23	1	3	2	2	1	0.5
Eng	1	6	25	1	3	2	2	1	0.5
Eng	1	6	26	1	3	2	2	1	0.5
Pitjantjatjara	2	7	1	1	6	5	5	1	0.2
Pitjantjatjara	2	7	2	1	6	5	5	1	0.2
Pitjantjatjara	2	7	5	1	6	5	5	1	0.2
Pitjantjatjara	2	7	6	1	6	5	5	1	0.2
Pitjantjatjara	2	7	7	1	6	5	5	1	0.2
Pitjantjatjara	2	7	10	1	6	5	5	1	0.2
Pitjantjatjara	2	7	12	1	6	5	5	1	0.2
Pitjantjatjara	2	7	13	1	6	5	5	1	0.2
Pitjantjatjara	2	7	16	1	6	5	5	1	0.2
Pitjantjatjara	2	7	17	1	6	5	5	1	0.2
Pitjantjatjara	2	7	18	1	6	5	5	1	0.2
Pitjantjatjara	2	7	19	1	6	5	5	1	0.2
Pitjantjatjara	2	7	20	1	6	5	5	1	0.2
Pitjantjatjara	2	7	23	1	6	5	5	1	0.2
Pitjantjatjara	2	7	25	1	6	5	5	1	0.2
Pitjantjatjara	2	7	26	1	6	5	5	1	0.2
Eng	2	7	1	1	6	5	5	1	0.2
Eng	2	7	2	1	6	5	5	1	0.2
Eng	2	7	5	1	6	5	5	1	0.2
Eng	2	7	6	1	6	5	5	1	0.2
Eng	2	7	7	1	6	5	5	1	0.2
Eng	2	7	10	1	6	5	5	1	0.2
Eng	2	7	12	1	6	5	5	1	0.2
Eng	2	7	13	1	6	5	5	1	0.2
Eng	2	7	16	1	6	5	5	1	0.2
Eng	2	7	17	1	6	5	5	1	0.2
Eng	2	7	18	1	6	5	5	1	0.2
Eng	2	7	19	1	6	5	5	1	0.2
Eng	2	7	20	1	6	5	5	1	0.2
Eng	2	7	23	1	6	5	5	1	0.2
Eng	2	7	25	1	6	5	5	1	0.2
Eng	2	7	26	1	6	5	5	1	0.2
Pitjantjatjara	3	8	1	1	9	8	8	1	0.125
Pitjantjatjara	3	8	2	0	9	8	8	1	0.125
Pitjantjatjara	3	8	5	0	9	8	8	1	0.125
Pitjantjatjara	3	8	6	1	9	8	8	1	0.125
Pitjantjatjara	3	8	7	1	9	8	8	1	0.125
Pitjantjatjara	3	8	10	1	9	8	8	1	0.125
Pitjantjatjara	3	8	12	1	9	8	8	1	0.125
Pitjantjatjara	3	8	13	1	9	8	8	1	0.125
Pitjantjatjara	3	8	16	1	9	8	8	1	0.125
Pitjantjatjara	3	8	17	1	9	8	8	1	0.125
Pitjantjatjara	3	8	18	1	9	8	8	1	0.125
Pitjantjatjara	3	8	19	1	9	8	8	1	0.125
Pitjantjatjara	3	8	20	1	9	8	8	1	0.125
Pitjantjatjara	3	8	23	1	9	8	8	1	0.125
Pitjantjatjara	3	8	25	1	9	8	8	1	0.125
Pitjantjatjara	3	8	26	0	9	8	8	1	0.125
Eng	3	8	1	1	9	8	8	1	0.125
Eng	3	8	2	1	9	8	8	1	0.125
Eng	3	8	5	0	9	8	8	1	0.125
Eng	3	8	6	1	9	8	8	1	0.125
Eng	3	8	7	1	9	8	8	1	0.125
Eng	3	8	10	1	9	8	8	1	0.125
Eng	3	8	12	1	9	8	8	1	0.125
Eng	3	8	13	1	9	8	8	1	0.125
Eng	3	8	16	1	9	8	8	1	0.125
Eng	3	8	17	1	9	8	8	1	0.125
Eng	3	8	18	1	9	8	8	1	0.125
Eng	3	8	19	1	9	8	8	1	0.125
Eng	3	8	20	1	9	8	8	1	0.125
Eng	3	8	23	1	9	8	8	1	0.125
Eng	3	8	25	1	9	8	8	1	0.125
Eng	3	8	26	1	9	8	8	1	0.125
Pitjantjatjara	4	9	1	1	4	2	2	2	1
Pitjantjatjara	4	9	2	1	4	2	2	2	1
Pitjantjatjara	4	9	5	1	4	2	2	2	1
Pitjantjatjara	4	9	6	1	4	2	2	2	1
Pitjantjatjara	4	9	7	1	4	2	2	2	1
Pitjantjatjara	4	9	10	1	4	2	2	2	1
Pitjantjatjara	4	9	12	1	4	2	2	2	1
Pitjantjatjara	4	9	13	1	4	2	2	2	1
Pitjantjatjara	4	9	16	1	4	2	2	2	1
Pitjantjatjara	4	9	17	1	4	2	2	2	1
Pitjantjatjara	4	9	18	1	4	2	2	2	1
Pitjantjatjara	4	9	19	1	4	2	2	2	1
Pitjantjatjara	4	9	20	1	4	2	2	2	1
Pitjantjatjara	4	9	23	1	4	2	2	2	1
Pitjantjatjara	4	9	25	1	4	2	2	2	1
Pitjantjatjara	4	9	26	1	4	2	2	2	1
Eng	4	9	1	1	4	2	2	2	1
Eng	4	9	2	1	4	2	2	2	1
Eng	4	9	5	1	4	2	2	2	1
Eng	4	9	6	1	4	2	2	2	1
Eng	4	9	7	1	4	2	2	2	1
Eng	4	9	10	1	4	2	2	2	1
Eng	4	9	12	1	4	2	2	2	1
Eng	4	9	13	1	4	2	2	2	1
Eng	4	9	16	1	4	2	2	2	1
Eng	4	9	17	1	4	2	2	2	1
Eng	4	9	18	1	4	2	2	2	1
Eng	4	9	19	1	4	2	2	2	1
Eng	4	9	20	1	4	2	2	2	1
Eng	4	9	23	1	4	2	2	2	1
Eng	4	9	25	1	4	2	2	2	1
Eng	4	9	26	1	4	2	2	2	1
Pitjantjatjara	5	10	1	1	9	7	7	2	0.285714
Pitjantjatjara	5	10	2	1	9	7	7	2	0.285714
Pitjantjatjara	5	10	5	1	9	7	7	2	0.285714
Pitjantjatjara	5	10	6	1	9	7	7	2	0.285714
Pitjantjatjara	5	10	7	1	9	7	7	2	0.285714
Pitjantjatjara	5	10	10	1	9	7	7	2	0.285714
Pitjantjatjara	5	10	12	1	9	7	7	2	0.285714
Pitjantjatjara	5	10	13	1	9	7	7	2	0.285714
Pitjantjatjara	5	10	16	1	9	7	7	2	0.285714
Pitjantjatjara	5	10	17	1	9	7	7	2	0.285714
Pitjantjatjara	5	10	18	1	9	7	7	2	0.285714
Pitjantjatjara	5	10	19	1	9	7	7	2	0.285714
Pitjantjatjara	5	10	20	1	9	7	7	2	0.285714
Pitjantjatjara	5	10	23	1	9	7	7	2	0.285714
Pitjantjatjara	5	10	25	1	9	7	7	2	0.285714
Pitjantjatjara	5	10	26	1	9	7	7	2	0.285714
Eng	5	10	1	1	9	7	7	2	0.285714
Eng	5	10	2	0	9	7	7	2	0.285714
Eng	5	10	5	1	9	7	7	2	0.285714
Eng	5	10	6	1	9	7	7	2	0.285714
Eng	5	10	7	1	9	7	7	2	0.285714
Eng	5	10	10	1	9	7	7	2	0.285714
Eng	5	10	12	1	9	7	7	2	0.285714
Eng	5	10	13	1	9	7	7	2	0.285714
Eng	5	10	16	1	9	7	7	2	0.285714
Eng	5	10	17	1	9	7	7	2	0.285714
Eng	5	10	18	1	9	7	7	2	0.285714
Eng	5	10	19	1	9	7	7	2	0.285714
Eng	5	10	20	1	9	7	7	2	0.285714
Eng	5	10	23	1	9	7	7	2	0.285714
Eng	5	10	25	1	9	7	7	2	0.285714
Eng	5	10	26	1	9	7	7	2	0.285714

## Sheet: Quantity-reaction time
language	trial	trial_full	participant_ID	RT	LeftComparatorinPair	RightComparatorinPair	LowestinPair	AbsDifferenceInPair	Ratio_AbsDiffDividedByLowest
Pitjantjatjara	1	1	1	4748	2	3	2	1	0.5
Pitjantjatjara	2	2	1	2483	5	6	5	1	0.2
Pitjantjatjara	3	3	1	16346	8	9	8	1	0.125
Pitjantjatjara	4	4	1	3555	2	4	2	2	1
Pitjantjatjara	5	5	1	8435	7	9	7	2	0.285714
Pitjantjatjara	1	6	1	1677	3	2	2	1	0.5
Pitjantjatjara	2	7	1	3166	6	5	5	1	0.2
Pitjantjatjara	3	8	1	2906	9	8	8	1	0.125
Pitjantjatjara	4	9	1	3236	4	2	2	2	1
Pitjantjatjara	5	10	1	1655	9	7	7	2	0.285714
Pitjantjatjara	1	1	2	1773	2	3	2	1	0.5
Pitjantjatjara	2	2	2	2866	5	6	5	1	0.2
Pitjantjatjara	3	3	2	6335	8	9	8	1	0.125
Pitjantjatjara	4	4	2	1407	2	4	2	2	1
Pitjantjatjara	5	5	2	6688	7	9	7	2	0.285714
Pitjantjatjara	1	6	2	1691	3	2	2	1	0.5
Pitjantjatjara	2	7	2	11319	6	5	5	1	0.2
Pitjantjatjara	3	8	2	4016	9	8	8	1	0.125
Pitjantjatjara	4	9	2	3435	4	2	2	2	1
Pitjantjatjara	5	10	2	2358	9	7	7	2	0.285714
Pitjantjatjara	1	1	5	286	2	3	2	1	0.5
Pitjantjatjara	2	2	5	284	5	6	5	1	0.2
Pitjantjatjara	3	3	5	401	8	9	8	1	0.125
Pitjantjatjara	4	4	5	485	2	4	2	2	1
Pitjantjatjara	5	5	5	344	7	9	7	2	0.285714
Pitjantjatjara	1	6	5	278	3	2	2	1	0.5
Pitjantjatjara	2	7	5	347	6	5	5	1	0.2
Pitjantjatjara	3	8	5	7722	9	8	8	1	0.125
Pitjantjatjara	4	9	5	1817	4	2	2	2	1
Pitjantjatjara	5	10	5	901	9	7	7	2	0.285714
Pitjantjatjara	1	1	6	698	2	3	2	1	0.5
Pitjantjatjara	2	2	6	1163	5	6	5	1	0.2
Pitjantjatjara	3	3	6	2273	8	9	8	1	0.125
Pitjantjatjara	4	4	6	4756	2	4	2	2	1
Pitjantjatjara	5	5	6	1532	7	9	7	2	0.285714
Pitjantjatjara	1	6	6	1011	3	2	2	1	0.5
Pitjantjatjara	2	7	6	1548	6	5	5	1	0.2
Pitjantjatjara	3	8	6	1882	9	8	8	1	0.125
Pitjantjatjara	4	9	6	798	4	2	2	2	1
Pitjantjatjara	5	10	6	3529	9	7	7	2	0.285714
Pitjantjatjara	1	1	7	687	2	3	2	1	0.5
Pitjantjatjara	2	2	7	1816	5	6	5	1	0.2
Pitjantjatjara	3	3	7	10501	8	9	8	1	0.125
Pitjantjatjara	4	4	7	626	2	4	2	2	1
Pitjantjatjara	5	5	7	4413	7	9	7	2	0.285714
Pitjantjatjara	1	6	7	1020	3	2	2	1	0.5
Pitjantjatjara	2	7	7	1675	6	5	5	1	0.2
Pitjantjatjara	3	8	7	1821	9	8	8	1	0.125
Pitjantjatjara	4	9	7	1219	4	2	2	2	1
Pitjantjatjara	5	10	7	1168	9	7	7	2	0.285714
Pitjantjatjara	1	1	10	1376	2	3	2	1	0.5
Pitjantjatjara	2	2	10	1890	5	6	5	1	0.2
Pitjantjatjara	3	3	10	3712	8	9	8	1	0.125
Pitjantjatjara	4	4	10	1892	2	4	2	2	1
Pitjantjatjara	5	5	10	5499	7	9	7	2	0.285714
Pitjantjatjara	1	6	10	1455	3	2	2	1	0.5
Pitjantjatjara	2	7	10	3379	6	5	5	1	0.2
Pitjantjatjara	3	8	10	3050	9	8	8	1	0.125
Pitjantjatjara	4	9	10	1339	4	2	2	2	1
Pitjantjatjara	5	10	10	2589	9	7	7	2	0.285714
Pitjantjatjara	1	1	12	864	2	3	2	1	0.5
Pitjantjatjara	2	2	12	1256	5	6	5	1	0.2
Pitjantjatjara	3	3	12	1622	8	9	8	1	0.125
Pitjantjatjara	4	4	12	947	2	4	2	2	1
Pitjantjatjara	5	5	12	1328	7	9	7	2	0.285714
Pitjantjatjara	1	6	12	1383	3	2	2	1	0.5
Pitjantjatjara	2	7	12	4136	6	5	5	1	0.2
Pitjantjatjara	3	8	12	1546	9	8	8	1	0.125
Pitjantjatjara	4	9	12	1180	4	2	2	2	1
Pitjantjatjara	5	10	12	1252	9	7	7	2	0.285714
Pitjantjatjara	1	1	13	1561	2	3	2	1	0.5
Pitjantjatjara	2	2	13	4444	5	6	5	1	0.2
Pitjantjatjara	3	3	13	2528	8	9	8	1	0.125
Pitjantjatjara	4	4	13	2057	2	4	2	2	1
Pitjantjatjara	5	5	13	2136	7	9	7	2	0.285714
Pitjantjatjara	1	6	13	1707	3	2	2	1	0.5
Pitjantjatjara	2	7	13	4456	6	5	5	1	0.2
Pitjantjatjara	3	8	13	8287	9	8	8	1	0.125
Pitjantjatjara	4	9	13	1840	4	2	2	2	1
Pitjantjatjara	5	10	13	1873	9	7	7	2	0.285714
Pitjantjatjara	1	1	16	1056	2	3	2	1	0.5
Pitjantjatjara	2	2	16	3899	5	6	5	1	0.2
Pitjantjatjara	3	3	16	5934	8	9	8	1	0.125
Pitjantjatjara	4	4	16	7478	2	4	2	2	1
Pitjantjatjara	5	5	16	4424	7	9	7	2	0.285714
Pitjantjatjara	1	6	16	2423	3	2	2	1	0.5
Pitjantjatjara	2	7	16	10761	6	5	5	1	0.2
Pitjantjatjara	3	8	16	7512	9	8	8	1	0.125
Pitjantjatjara	4	9	16	955	4	2	2	2	1
Pitjantjatjara	5	10	16	1430	9	7	7	2	0.285714
Pitjantjatjara	1	1	17	510	2	3	2	1	0.5
Pitjantjatjara	2	2	17	1076	5	6	5	1	0.2
Pitjantjatjara	3	3	17	1337	8	9	8	1	0.125
Pitjantjatjara	4	4	17	602	2	4	2	2	1
Pitjantjatjara	5	5	17	637	7	9	7	2	0.285714
Pitjantjatjara	1	6	17	932	3	2	2	1	0.5
Pitjantjatjara	2	7	17	3564	6	5	5	1	0.2
Pitjantjatjara	3	8	17	520	9	8	8	1	0.125
Pitjantjatjara	4	9	17	632	4	2	2	2	1
Pitjantjatjara	5	10	17	862	9	7	7	2	0.285714
Pitjantjatjara	1	1	18	9365	2	3	2	1	0.5
Pitjantjatjara	2	2	18	8870	5	6	5	1	0.2
Pitjantjatjara	3	3	18	6511	8	9	8	1	0.125
Pitjantjatjara	4	4	18	8324	2	4	2	2	1
Pitjantjatjara	5	5	18	1224	7	9	7	2	0.285714
Pitjantjatjara	1	6	18	4085	3	2	2	1	0.5
Pitjantjatjara	2	7	18	6082	6	5	5	1	0.2
Pitjantjatjara	3	8	18	15110	9	8	8	1	0.125
Pitjantjatjara	4	9	18	1726	4	2	2	2	1
Pitjantjatjara	5	10	18	3556	9	7	7	2	0.285714
Pitjantjatjara	1	1	19	822	2	3	2	1	0.5
Pitjantjatjara	2	2	19	3658	5	6	5	1	0.2
Pitjantjatjara	3	3	19	2436	8	9	8	1	0.125
Pitjantjatjara	4	4	19	838	2	4	2	2	1
Pitjantjatjara	5	5	19	1605	7	9	7	2	0.285714
Pitjantjatjara	1	6	19	618	3	2	2	1	0.5
Pitjantjatjara	2	7	19	686	6	5	5	1	0.2
Pitjantjatjara	3	8	19	1178	9	8	8	1	0.125
Pitjantjatjara	4	9	19	568	4	2	2	2	1
Pitjantjatjara	5	10	19	775	9	7	7	2	0.285714
Pitjantjatjara	1	1	20	968	2	3	2	1	0.5
Pitjantjatjara	2	2	20	6658	5	6	5	1	0.2
Pitjantjatjara	3	3	20	2108	8	9	8	1	0.125
Pitjantjatjara	4	4	20	706	2	4	2	2	1
Pitjantjatjara	5	5	20	861	7	9	7	2	0.285714
Pitjantjatjara	1	6	20	1194	3	2	2	1	0.5
Pitjantjatjara	2	7	20	1133	6	5	5	1	0.2
Pitjantjatjara	3	8	20	1910	9	8	8	1	0.125
Pitjantjatjara	4	9	20	946	4	2	2	2	1
Pitjantjatjara	5	10	20	861	9	7	7	2	0.285714
Pitjantjatjara	1	1	23	975	2	3	2	1	0.5
Pitjantjatjara	2	2	23	2178	5	6	5	1	0.2
Pitjantjatjara	3	3	23	1766	8	9	8	1	0.125
Pitjantjatjara	4	4	23	1602	2	4	2	2	1
Pitjantjatjara	5	5	23	1610	7	9	7	2	0.285714
Pitjantjatjara	1	6	23	1184	3	2	2	1	0.5
Pitjantjatjara	2	7	23	3013	6	5	5	1	0.2
Pitjantjatjara	3	8	23	5542	9	8	8	1	0.125
Pitjantjatjara	4	9	23	2052	4	2	2	2	1
Pitjantjatjara	5	10	23	1262	9	7	7	2	0.285714
Pitjantjatjara	1	1	25	670	2	3	2	1	0.5
Pitjantjatjara	2	2	25	2774	5	6	5	1	0.2
Pitjantjatjara	3	3	25	2268	8	9	8	1	0.125
Pitjantjatjara	4	4	25	2014	2	4	2	2	1
Pitjantjatjara	5	5	25	2548	7	9	7	2	0.285714
Pitjantjatjara	1	6	25	770	3	2	2	1	0.5
Pitjantjatjara	2	7	25	1495	6	5	5	1	0.2
Pitjantjatjara	3	8	25	1043	9	8	8	1	0.125
Pitjantjatjara	4	9	25	660	4	2	2	2	1
Pitjantjatjara	5	10	25	1009	9	7	7	2	0.285714
Pitjantjatjara	1	1	26	9623	2	3	2	1	0.5
Pitjantjatjara	2	2	26	7493	5	6	5	1	0.2
Pitjantjatjara	3	3	26	4883	8	9	8	1	0.125
Pitjantjatjara	4	4	26	11551	2	4	2	2	1
Pitjantjatjara	5	5	26	6250	7	9	7	2	0.285714
Pitjantjatjara	1	6	26	30152	3	2	2	1	0.5
Pitjantjatjara	2	7	26	2182	6	5	5	1	0.2
Pitjantjatjara	3	8	26	4613	9	8	8	1	0.125
Pitjantjatjara	4	9	26	7726	4	2	2	2	1
Pitjantjatjara	5	10	26	10018	9	7	7	2	0.285714
Eng	1	1	1	1331	2	3	2	1	0.5
Eng	2	2	1	2129	5	6	5	1	0.2
Eng	3	3	1	16332	8	9	8	1	0.125
Eng	4	4	1	1403	2	4	2	2	1
Eng	5	5	1	1813	7	9	7	2	0.285714
Eng	1	6	1	837	3	2	2	1	0.5
Eng	2	7	1	4113	6	5	5	1	0.2
Eng	3	8	1	1646	9	8	8	1	0.125
Eng	4	9	1	1446	4	2	2	2	1
Eng	5	10	1	4201	9	7	7	2	0.285714
Eng	1	1	2	2106	2	3	2	1	0.5
Eng	2	2	2	2584	5	6	5	1	0.2
Eng	3	3	2	5016	8	9	8	1	0.125
Eng	4	4	2	1565	2	4	2	2	1
Eng	5	5	2	6732	7	9	7	2	0.285714
Eng	1	6	2	1336	3	2	2	1	0.5
Eng	2	7	2	1243	6	5	5	1	0.2
Eng	3	8	2	4459	9	8	8	1	0.125
Eng	4	9	2	1510	4	2	2	2	1
Eng	5	10	2	16282	9	7	7	2	0.285714
Eng	1	1	5	27012	2	3	2	1	0.5
Eng	2	2	5	40353	5	6	5	1	0.2
Eng	3	3	5	453	8	9	8	1	0.125
Eng	4	4	5	8706	2	4	2	2	1
Eng	5	5	5	497	7	9	7	2	0.285714
Eng	1	6	5	21627	3	2	2	1	0.5
Eng	2	7	5	3117	6	5	5	1	0.2
Eng	3	8	5	45276	9	8	8	1	0.125
Eng	4	9	5	630	4	2	2	2	1
Eng	5	10	5	15319	9	7	7	2	0.285714
Eng	1	1	6	6145	2	3	2	1	0.5
Eng	2	2	6	1501	5	6	5	1	0.2
Eng	3	3	6	2108	8	9	8	1	0.125
Eng	4	4	6	876	2	4	2	2	1
Eng	5	5	6	1193	7	9	7	2	0.285714
Eng	1	6	6	1024	3	2	2	1	0.5
Eng	2	7	6	1192	6	5	5	1	0.2
Eng	3	8	6	5913	9	8	8	1	0.125
Eng	4	9	6	4933	4	2	2	2	1
Eng	5	10	6	1008	9	7	7	2	0.285714
Eng	1	1	7	1145	2	3	2	1	0.5
Eng	2	2	7	3523	5	6	5	1	0.2
Eng	3	3	7	1423	8	9	8	1	0.125
Eng	4	4	7	14652	2	4	2	2	1
Eng	5	5	7	1521	7	9	7	2	0.285714
Eng	1	6	7	2029	3	2	2	1	0.5
Eng	2	7	7	3921	6	5	5	1	0.2
Eng	3	8	7	3651	9	8	8	1	0.125
Eng	4	9	7	1500	4	2	2	2	1
Eng	5	10	7	11077	9	7	7	2	0.285714
Eng	1	1	10	654	2	3	2	1	0.5
Eng	2	2	10	972	5	6	5	1	0.2
Eng	3	3	10	1477	8	9	8	1	0.125
Eng	4	4	10	872	2	4	2	2	1
Eng	5	5	10	2189	7	9	7	2	0.285714
Eng	1	6	10	2000	3	2	2	1	0.5
Eng	2	7	10	2833	6	5	5	1	0.2
Eng	3	8	10	1248	9	8	8	1	0.125
Eng	4	9	10	1575	4	2	2	2	1
Eng	5	10	10	1828	9	7	7	2	0.285714
Eng	1	1	12	730	2	3	2	1	0.5
Eng	2	2	12	783	5	6	5	1	0.2
Eng	3	3	12	1982	8	9	8	1	0.125
Eng	4	4	12	1114	2	4	2	2	1
Eng	5	5	12	1421	7	9	7	2	0.285714
Eng	1	6	12	626	3	2	2	1	0.5
Eng	2	7	12	1302	6	5	5	1	0.2
Eng	3	8	12	1050	9	8	8	1	0.125
Eng	4	9	12	538	4	2	2	2	1
Eng	5	10	12	1765	9	7	7	2	0.285714
Eng	1	1	13	1464	2	3	2	1	0.5
Eng	2	2	13	1691	5	6	5	1	0.2
Eng	3	3	13	2333	8	9	8	1	0.125
Eng	4	4	13	1142	2	4	2	2	1
Eng	5	5	13	1359	7	9	7	2	0.285714
Eng	1	6	13	1318	3	2	2	1	0.5
Eng	2	7	13	2605	6	5	5	1	0.2
Eng	3	8	13	2144	9	8	8	1	0.125
Eng	4	9	13	1279	4	2	2	2	1
Eng	5	10	13	2789	9	7	7	2	0.285714
Eng	1	1	16	1783	2	3	2	1	0.5
Eng	2	2	16	3253	5	6	5	1	0.2
Eng	3	3	16	6403	8	9	8	1	0.125
Eng	4	4	16	2664	2	4	2	2	1
Eng	5	5	16	1868	7	9	7	2	0.285714
Eng	1	6	16	3374	3	2	2	1	0.5
Eng	2	7	16	3070	6	5	5	1	0.2
Eng	3	8	16	3020	9	8	8	1	0.125
Eng	4	9	16	1883	4	2	2	2	1
Eng	5	10	16	8532	9	7	7	2	0.285714
Eng	1	1	17	569	2	3	2	1	0.5
Eng	2	2	17	4275	5	6	5	1	0.2
Eng	3	3	17	1138	8	9	8	1	0.125
Eng	4	4	17	614	2	4	2	2	1
Eng	5	5	17	1042	7	9	7	2	0.285714
Eng	1	6	17	2266	3	2	2	1	0.5
Eng	2	7	17	4119	6	5	5	1	0.2
Eng	3	8	17	1225	9	8	8	1	0.125
Eng	4	9	17	877	4	2	2	2	1
Eng	5	10	17	774	9	7	7	2	0.285714
Eng	1	1	18	1706	2	3	2	1	0.5
Eng	2	2	18	9341	5	6	5	1	0.2
Eng	3	3	18	3116	8	9	8	1	0.125
Eng	4	4	18	1748	2	4	2	2	1
Eng	5	5	18	2568	7	9	7	2	0.285714
Eng	1	6	18	10868	3	2	2	1	0.5
Eng	2	7	18	1161	6	5	5	1	0.2
Eng	3	8	18	2149	9	8	8	1	0.125
Eng	4	9	18	1684	4	2	2	2	1
Eng	5	10	18	2712	9	7	7	2	0.285714
Eng	1	1	19	1927	2	3	2	1	0.5
Eng	2	2	19	2209	5	6	5	1	0.2
Eng	3	3	19	17237	8	9	8	1	0.125
Eng	4	4	19	2784	2	4	2	2	1
Eng	5	5	19	1629	7	9	7	2	0.285714
Eng	1	6	19	2312	3	2	2	1	0.5
Eng	2	7	19	2096	6	5	5	1	0.2
Eng	3	8	19	4752	9	8	8	1	0.125
Eng	4	9	19	892	4	2	2	2	1
Eng	5	10	19	1433	9	7	7	2	0.285714
Eng	1	1	20	481	2	3	2	1	0.5
Eng	2	2	20	900	5	6	5	1	0.2
Eng	3	3	20	1289	8	9	8	1	0.125
Eng	4	4	20	497	2	4	2	2	1
Eng	5	5	20	573	7	9	7	2	0.285714
Eng	1	6	20	654	3	2	2	1	0.5
Eng	2	7	20	731	6	5	5	1	0.2
Eng	3	8	20	625	9	8	8	1	0.125
Eng	4	9	20	524	4	2	2	2	1
Eng	5	10	20	669	9	7	7	2	0.285714
Eng	1	1	23	938	2	3	2	1	0.5
Eng	2	2	23	3916	5	6	5	1	0.2
Eng	3	3	23	1804	8	9	8	1	0.125
Eng	4	4	23	599	2	4	2	2	1
Eng	5	5	23	2499	7	9	7	2	0.285714
Eng	1	6	23	1282	3	2	2	1	0.5
Eng	2	7	23	4431	6	5	5	1	0.2
Eng	3	8	23	2594	9	8	8	1	0.125
Eng	4	9	23	908	4	2	2	2	1
Eng	5	10	23	1633	9	7	7	2	0.285714
Eng	1	1	25	789	2	3	2	1	0.5
Eng	2	2	25	3363	5	6	5	1	0.2
Eng	3	3	25	8238	8	9	8	1	0.125
Eng	4	4	25	650	2	4	2	2	1
Eng	5	5	25	1829	7	9	7	2	0.285714
Eng	1	6	25	1024	3	2	2	1	0.5
Eng	2	7	25	2145	6	5	5	1	0.2
Eng	3	8	25	2521	9	8	8	1	0.125
Eng	4	9	25	1086	4	2	2	2	1
Eng	5	10	25	1245	9	7	7	2	0.285714
Eng	1	1	26	853	2	3	2	1	0.5
Eng	2	2	26	6661	5	6	5	1	0.2
Eng	3	3	26	5327	8	9	8	1	0.125
Eng	4	4	26	1395	2	4	2	2	1
Eng	5	5	26	3671	7	9	7	2	0.285714
Eng	1	6	26	2027	3	2	2	1	0.5
Eng	2	7	26	3218	6	5	5	1	0.2
Eng	3	8	26	4682	9	8	8	1	0.125
Eng	4	9	26	1614	4	2	2	2	1
Eng	5	10	26	2503	9	7	7	2	0.285714

## Sheet: Extent-correct
language	trial	trial_full	participant_ID	choice	LeftComparatorinPair	RightComparatorinPair	LowestinPair	AbsDifferenceInPair	Ratio_AbsDiffDividedByLowest
English	1	1	1	1	25	30	25	5	0.2
Pitjantjatjara	1	1	1	1	25	30	25	5	0.2
English	2	2	1	1	45	50	45	5	0.111111
Pitjantjatjara	2	2	1	1	45	50	45	5	0.111111
English	3	3	1	1	30	50	30	20	0.666667
Pitjantjatjara	3	3	1	1	30	50	30	20	0.666667
English	4	4	1	1	25	50	25	25	1
Pitjantjatjara	4	4	1	1	25	50	25	25	1
English	5	5	1	1	25	60	25	35	1.4
Pitjantjatjara	5	5	1	1	25	60	25	35	1.4
English	1	6	1	1	30	25	25	5	0.2
Pitjantjatjara	1	6	1	1	30	25	25	5	0.2
English	2	7	1	1	50	45	45	5	0.111111
Pitjantjatjara	2	7	1	1	50	45	45	5	0.111111
English	3	8	1	1	50	30	30	20	0.666667
Pitjantjatjara	3	8	1	1	50	30	30	20	0.666667
English	4	9	1	1	50	25	25	25	1
Pitjantjatjara	4	9	1	1	50	25	25	25	1
English	5	10	1	1	60	25	25	35	1.4
Pitjantjatjara	5	10	1	1	60	25	25	35	1.4
English	1	1	2	1	25	30	25	5	0.2
Pitjantjatjara	1	1	2	0	25	30	25	5	0.2
English	2	2	2	1	45	50	45	5	0.111111
Pitjantjatjara	2	2	2	1	45	50	45	5	0.111111
English	3	3	2	1	30	50	30	20	0.666667
Pitjantjatjara	3	3	2	0	30	50	30	20	0.666667
English	4	4	2	1	25	50	25	25	1
Pitjantjatjara	4	4	2	1	25	50	25	25	1
English	5	5	2	1	25	60	25	35	1.4
Pitjantjatjara	5	5	2	1	25	60	25	35	1.4
English	1	6	2	1	30	25	25	5	0.2
Pitjantjatjara	1	6	2	1	30	25	25	5	0.2
English	2	7	2	1	50	45	45	5	0.111111
Pitjantjatjara	2	7	2	0	50	45	45	5	0.111111
English	3	8	2	1	50	30	30	20	0.666667
Pitjantjatjara	3	8	2	1	50	30	30	20	0.666667
English	4	9	2	1	50	25	25	25	1
Pitjantjatjara	4	9	2	1	50	25	25	25	1
English	5	10	2	1	60	25	25	35	1.4
Pitjantjatjara	5	10	2	1	60	25	25	35	1.4
English	1	1	5	1	25	30	25	5	0.2
Pitjantjatjara	1	1	5	0	25	30	25	5	0.2
English	2	2	5	0	45	50	45	5	0.111111
Pitjantjatjara	2	2	5	0	45	50	45	5	0.111111
English	3	3	5	0	30	50	30	20	0.666667
Pitjantjatjara	3	3	5	0	30	50	30	20	0.666667
English	4	4	5	1	25	50	25	25	1
Pitjantjatjara	4	4	5	0	25	50	25	25	1
English	5	5	5	0	25	60	25	35	1.4
Pitjantjatjara	5	5	5	0	25	60	25	35	1.4
English	1	6	5	1	30	25	25	5	0.2
Pitjantjatjara	1	6	5	0	30	25	25	5	0.2
English	2	7	5	0	50	45	45	5	0.111111
Pitjantjatjara	2	7	5	0	50	45	45	5	0.111111
English	3	8	5	1	50	30	30	20	0.666667
Pitjantjatjara	3	8	5	0	50	30	30	20	0.666667
English	4	9	5	0	50	25	25	25	1
Pitjantjatjara	4	9	5	1	50	25	25	25	1
English	5	10	5	0	60	25	25	35	1.4
Pitjantjatjara	5	10	5	0	60	25	25	35	1.4
English	1	1	6	1	25	30	25	5	0.2
Pitjantjatjara	1	1	6	1	25	30	25	5	0.2
English	2	2	6	1	45	50	45	5	0.111111
Pitjantjatjara	2	2	6	1	45	50	45	5	0.111111
English	3	3	6	1	30	50	30	20	0.666667
Pitjantjatjara	3	3	6	1	30	50	30	20	0.666667
English	4	4	6	1	25	50	25	25	1
Pitjantjatjara	4	4	6	1	25	50	25	25	1
English	5	5	6	1	25	60	25	35	1.4
Pitjantjatjara	5	5	6	1	25	60	25	35	1.4
English	1	6	6	1	30	25	25	5	0.2
Pitjantjatjara	1	6	6	1	30	25	25	5	0.2
English	2	7	6	1	50	45	45	5	0.111111
Pitjantjatjara	2	7	6	0	50	45	45	5	0.111111
English	3	8	6	1	50	30	30	20	0.666667
Pitjantjatjara	3	8	6	1	50	30	30	20	0.666667
English	4	9	6	1	50	25	25	25	1
Pitjantjatjara	4	9	6	1	50	25	25	25	1
English	5	10	6	1	60	25	25	35	1.4
Pitjantjatjara	5	10	6	1	60	25	25	35	1.4
English	1	1	7	1	25	30	25	5	0.2
Pitjantjatjara	1	1	7	1	25	30	25	5	0.2
English	2	2	7	1	45	50	45	5	0.111111
Pitjantjatjara	2	2	7	1	45	50	45	5	0.111111
English	3	3	7	1	30	50	30	20	0.666667
Pitjantjatjara	3	3	7	1	30	50	30	20	0.666667
English	4	4	7	1	25	50	25	25	1
Pitjantjatjara	4	4	7	1	25	50	25	25	1
English	5	5	7	1	25	60	25	35	1.4
Pitjantjatjara	5	5	7	1	25	60	25	35	1.4
English	1	6	7	1	30	25	25	5	0.2
Pitjantjatjara	1	6	7	1	30	25	25	5	0.2
English	2	7	7	1	50	45	45	5	0.111111
Pitjantjatjara	2	7	7	1	50	45	45	5	0.111111
English	3	8	7	1	50	30	30	20	0.666667
Pitjantjatjara	3	8	7	1	50	30	30	20	0.666667
English	4	9	7	1	50	25	25	25	1
Pitjantjatjara	4	9	7	1	50	25	25	25	1
English	5	10	7	1	60	25	25	35	1.4
Pitjantjatjara	5	10	7	1	60	25	25	35	1.4
English	1	1	10	1	25	30	25	5	0.2
Pitjantjatjara	1	1	10	1	25	30	25	5	0.2
English	2	2	10	1	45	50	45	5	0.111111
Pitjantjatjara	2	2	10	1	45	50	45	5	0.111111
English	3	3	10	1	30	50	30	20	0.666667
Pitjantjatjara	3	3	10	1	30	50	30	20	0.666667
English	4	4	10	1	25	50	25	25	1
Pitjantjatjara	4	4	10	1	25	50	25	25	1
English	5	5	10	1	25	60	25	35	1.4
Pitjantjatjara	5	5	10	1	25	60	25	35	1.4
English	1	6	10	1	30	25	25	5	0.2
Pitjantjatjara	1	6	10	1	30	25	25	5	0.2
English	2	7	10	1	50	45	45	5	0.111111
Pitjantjatjara	2	7	10	1	50	45	45	5	0.111111
English	3	8	10	1	50	30	30	20	0.666667
Pitjantjatjara	3	8	10	1	50	30	30	20	0.666667
English	4	9	10	1	50	25	25	25	1
Pitjantjatjara	4	9	10	1	50	25	25	25	1
English	5	10	10	1	60	25	25	35	1.4
Pitjantjatjara	5	10	10	1	60	25	25	35	1.4
English	1	1	12	1	25	30	25	5	0.2
Pitjantjatjara	1	1	12	1	25	30	25	5	0.2
English	2	2	12	1	45	50	45	5	0.111111
Pitjantjatjara	2	2	12	1	45	50	45	5	0.111111
English	3	3	12	1	30	50	30	20	0.666667
Pitjantjatjara	3	3	12	1	30	50	30	20	0.666667
English	4	4	12	1	25	50	25	25	1
Pitjantjatjara	4	4	12	1	25	50	25	25	1
English	5	5	12	1	25	60	25	35	1.4
Pitjantjatjara	5	5	12	1	25	60	25	35	1.4
English	1	6	12	1	30	25	25	5	0.2
Pitjantjatjara	1	6	12	1	30	25	25	5	0.2
English	2	7	12	1	50	45	45	5	0.111111
Pitjantjatjara	2	7	12	1	50	45	45	5	0.111111
English	3	8	12	1	50	30	30	20	0.666667
Pitjantjatjara	3	8	12	1	50	30	30	20	0.666667
English	4	9	12	1	50	25	25	25	1
Pitjantjatjara	4	9	12	1	50	25	25	25	1
English	5	10	12	1	60	25	25	35	1.4
Pitjantjatjara	5	10	12	1	60	25	25	35	1.4
English	1	1	13	1	25	30	25	5	0.2
Pitjantjatjara	1	1	13	1	25	30	25	5	0.2
English	2	2	13	1	45	50	45	5	0.111111
Pitjantjatjara	2	2	13	1	45	50	45	5	0.111111
English	3	3	13	1	30	50	30	20	0.666667
Pitjantjatjara	3	3	13	1	30	50	30	20	0.666667
English	4	4	13	1	25	50	25	25	1
Pitjantjatjara	4	4	13	1	25	50	25	25	1
English	5	5	13	1	25	60	25	35	1.4
Pitjantjatjara	5	5	13	1	25	60	25	35	1.4
English	1	6	13	1	30	25	25	5	0.2
Pitjantjatjara	1	6	13	1	30	25	25	5	0.2
English	2	7	13	1	50	45	45	5	0.111111
Pitjantjatjara	2	7	13	1	50	45	45	5	0.111111
English	3	8	13	1	50	30	30	20	0.666667
Pitjantjatjara	3	8	13	1	50	30	30	20	0.666667
English	4	9	13	1	50	25	25	25	1
Pitjantjatjara	4	9	13	1	50	25	25	25	1
English	5	10	13	1	60	25	25	35	1.4
Pitjantjatjara	5	10	13	1	60	25	25	35	1.4
English	1	1	16	1	25	30	25	5	0.2
Pitjantjatjara	1	1	16	1	25	30	25	5	0.2
English	2	2	16	1	45	50	45	5	0.111111
Pitjantjatjara	2	2	16	1	45	50	45	5	0.111111
English	3	3	16	1	30	50	30	20	0.666667
Pitjantjatjara	3	3	16	1	30	50	30	20	0.666667
English	4	4	16	1	25	50	25	25	1
Pitjantjatjara	4	4	16	1	25	50	25	25	1
English	5	5	16	1	25	60	25	35	1.4
Pitjantjatjara	5	5	16	1	25	60	25	35	1.4
English	1	6	16	1	30	25	25	5	0.2
Pitjantjatjara	1	6	16	1	30	25	25	5	0.2
English	2	7	16	1	50	45	45	5	0.111111
Pitjantjatjara	2	7	16	1	50	45	45	5	0.111111
English	3	8	16	1	50	30	30	20	0.666667
Pitjantjatjara	3	8	16	1	50	30	30	20	0.666667
English	4	9	16	1	50	25	25	25	1
Pitjantjatjara	4	9	16	1	50	25	25	25	1
English	5	10	16	1	60	25	25	35	1.4
Pitjantjatjara	5	10	16	1	60	25	25	35	1.4
English	1	1	17	1	25	30	25	5	0.2
Pitjantjatjara	1	1	17	0	25	30	25	5	0.2
English	2	2	17	1	45	50	45	5	0.111111
Pitjantjatjara	2	2	17	0	45	50	45	5	0.111111
English	3	3	17	1	30	50	30	20	0.666667
Pitjantjatjara	3	3	17	1	30	50	30	20	0.666667
English	4	4	17	1	25	50	25	25	1
Pitjantjatjara	4	4	17	1	25	50	25	25	1
English	5	5	17	1	25	60	25	35	1.4
Pitjantjatjara	5	5	17	1	25	60	25	35	1.4
English	1	6	17	1	30	25	25	5	0.2
Pitjantjatjara	1	6	17	0	30	25	25	5	0.2
English	2	7	17	1	50	45	45	5	0.111111
Pitjantjatjara	2	7	17	0	50	45	45	5	0.111111
English	3	8	17	1	50	30	30	20	0.666667
Pitjantjatjara	3	8	17	1	50	30	30	20	0.666667
English	4	9	17	1	50	25	25	25	1
Pitjantjatjara	4	9	17	1	50	25	25	25	1
English	5	10	17	1	60	25	25	35	1.4
Pitjantjatjara	5	10	17	1	60	25	25	35	1.4
English	1	1	18	1	25	30	25	5	0.2
Pitjantjatjara	1	1	18	0	25	30	25	5	0.2
English	2	2	18	0	45	50	45	5	0.111111
Pitjantjatjara	2	2	18	0	45	50	45	5	0.111111
English	3	3	18	1	30	50	30	20	0.666667
Pitjantjatjara	3	3	18	1	30	50	30	20	0.666667
English	4	4	18	1	25	50	25	25	1
Pitjantjatjara	4	4	18	1	25	50	25	25	1
English	5	5	18	1	25	60	25	35	1.4
Pitjantjatjara	5	5	18	1	25	60	25	35	1.4
English	1	6	18	1	30	25	25	5	0.2
Pitjantjatjara	1	6	18	0	30	25	25	5	0.2
English	2	7	18	1	50	45	45	5	0.111111
Pitjantjatjara	2	7	18	0	50	45	45	5	0.111111
English	3	8	18	1	50	30	30	20	0.666667
Pitjantjatjara	3	8	18	1	50	30	30	20	0.666667
English	4	9	18	1	50	25	25	25	1
Pitjantjatjara	4	9	18	1	50	25	25	25	1
English	5	10	18	1	60	25	25	35	1.4
Pitjantjatjara	5	10	18	1	60	25	25	35	1.4
English	1	1	19	1	25	30	25	5	0.2
Pitjantjatjara	1	1	19	1	25	30	25	5	0.2
English	2	2	19	1	45	50	45	5	0.111111
Pitjantjatjara	2	2	19	1	45	50	45	5	0.111111
English	3	3	19	1	30	50	30	20	0.666667
Pitjantjatjara	3	3	19	1	30	50	30	20	0.666667
English	4	4	19	1	25	50	25	25	1
Pitjantjatjara	4	4	19	1	25	50	25	25	1
English	5	5	19	1	25	60	25	35	1.4
Pitjantjatjara	5	5	19	1	25	60	25	35	1.4
English	1	6	19	1	30	25	25	5	0.2
Pitjantjatjara	1	6	19	1	30	25	25	5	0.2
English	2	7	19	1	50	45	45	5	0.111111
Pitjantjatjara	2	7	19	1	50	45	45	5	0.111111
English	3	8	19	1	50	30	30	20	0.666667
Pitjantjatjara	3	8	19	1	50	30	30	20	0.666667
English	4	9	19	1	50	25	25	25	1
Pitjantjatjara	4	9	19	1	50	25	25	25	1
English	5	10	19	1	60	25	25	35	1.4
Pitjantjatjara	5	10	19	1	60	25	25	35	1.4
English	1	1	20	1	25	30	25	5	0.2
Pitjantjatjara	1	1	20	1	25	30	25	5	0.2
English	2	2	20	1	45	50	45	5	0.111111
Pitjantjatjara	2	2	20	1	45	50	45	5	0.111111
English	3	3	20	1	30	50	30	20	0.666667
Pitjantjatjara	3	3	20	1	30	50	30	20	0.666667
English	4	4	20	1	25	50	25	25	1
Pitjantjatjara	4	4	20	1	25	50	25	25	1
English	5	5	20	1	25	60	25	35	1.4
Pitjantjatjara	5	5	20	1	25	60	25	35	1.4
English	1	6	20	1	30	25	25	5	0.2
Pitjantjatjara	1	6	20	1	30	25	25	5	0.2
English	2	7	20	0	50	45	45	5	0.111111
Pitjantjatjara	2	7	20	0	50	45	45	5	0.111111
English	3	8	20	1	50	30	30	20	0.666667
Pitjantjatjara	3	8	20	1	50	30	30	20	0.666667
English	4	9	20	1	50	25	25	25	1
Pitjantjatjara	4	9	20	1	50	25	25	25	1
English	5	10	20	1	60	25	25	35	1.4
Pitjantjatjara	5	10	20	1	60	25	25	35	1.4
English	1	1	23	1	25	30	25	5	0.2
Pitjantjatjara	1	1	23	1	25	30	25	5	0.2
English	2	2	23	1	45	50	45	5	0.111111
Pitjantjatjara	2	2	23	1	45	50	45	5	0.111111
English	3	3	23	1	30	50	30	20	0.666667
Pitjantjatjara	3	3	23	1	30	50	30	20	0.666667
English	4	4	23	1	25	50	25	25	1
Pitjantjatjara	4	4	23	1	25	50	25	25	1
English	5	5	23	1	25	60	25	35	1.4
Pitjantjatjara	5	5	23	1	25	60	25	35	1.4
English	1	6	23	1	30	25	25	5	0.2
Pitjantjatjara	1	6	23	1	30	25	25	5	0.2
English	2	7	23	1	50	45	45	5	0.111111
Pitjantjatjara	2	7	23	1	50	45	45	5	0.111111
English	3	8	23	1	50	30	30	20	0.666667
Pitjantjatjara	3	8	23	1	50	30	30	20	0.666667
English	4	9	23	1	50	25	25	25	1
Pitjantjatjara	4	9	23	1	50	25	25	25	1
English	5	10	23	1	60	25	25	35	1.4
Pitjantjatjara	5	10	23	1	60	25	25	35	1.4
English	1	1	25	1	25	30	25	5	0.2
Pitjantjatjara	1	1	25	1	25	30	25	5	0.2
English	2	2	25	1	45	50	45	5	0.111111
Pitjantjatjara	2	2	25	1	45	50	45	5	0.111111
English	3	3	25	1	30	50	30	20	0.666667
Pitjantjatjara	3	3	25	1	30	50	30	20	0.666667
English	4	4	25	1	25	50	25	25	1
Pitjantjatjara	4	4	25	1	25	50	25	25	1
English	5	5	25	1	25	60	25	35	1.4
Pitjantjatjara	5	5	25	1	25	60	25	35	1.4
English	1	6	25	1	30	25	25	5	0.2
Pitjantjatjara	1	6	25	1	30	25	25	5	0.2
English	2	7	25	1	50	45	45	5	0.111111
Pitjantjatjara	2	7	25	1	50	45	45	5	0.111111
English	3	8	25	1	50	30	30	20	0.666667
Pitjantjatjara	3	8	25	1	50	30	30	20	0.666667
English	4	9	25	1	50	25	25	25	1
Pitjantjatjara	4	9	25	1	50	25	25	25	1
English	5	10	25	1	60	25	25	35	1.4
Pitjantjatjara	5	10	25	1	60	25	25	35	1.4
English	1	1	26	1	25	30	25	5	0.2
Pitjantjatjara	1	1	26	1	25	30	25	5	0.2
English	2	2	26	1	45	50	45	5	0.111111
Pitjantjatjara	2	2	26	0	45	50	45	5	0.111111
English	3	3	26	1	30	50	30	20	0.666667
Pitjantjatjara	3	3	26	1	30	50	30	20	0.666667
English	4	4	26	1	25	50	25	25	1
Pitjantjatjara	4	4	26	1	25	50	25	25	1
English	5	5	26	1	25	60	25	35	1.4
Pitjantjatjara	5	5	26	1	25	60	25	35	1.4
English	1	6	26	1	30	25	25	5	0.2
Pitjantjatjara	1	6	26	1	30	25	25	5	0.2
English	2	7	26	1	50	45	45	5	0.111111
Pitjantjatjara	2	7	26	1	50	45	45	5	0.111111
English	3	8	26	1	50	30	30	20	0.666667
Pitjantjatjara	3	8	26	1	50	30	30	20	0.666667
English	4	9	26	1	50	25	25	25	1
Pitjantjatjara	4	9	26	1	50	25	25	25	1
English	5	10	26	1	60	25	25	35	1.4
Pitjantjatjara	5	10	26	1	60	25	25	35	1.4

## Sheet: Extent-reaction time
language	trial	trial_full	participant_ID	RT	LeftComparatorinPair	RightComparatorinPair	LowestinPair	AbsDifferenceInPair	Ratio_AbsDiffDividedByLowest
English	1	1	1	1588	25	30	25	5	0.2
Pitjantjatjara	1	1	1	2000	25	30	25	5	0.2
English	2	2	1	1326	45	50	45	5	0.111111
Pitjantjatjara	2	2	1	62	45	50	45	5	0.111111
English	3	3	1	746	30	50	30	20	0.666667
Pitjantjatjara	3	3	1	615	30	50	30	20	0.666667
English	4	4	1	971	25	50	25	25	1
Pitjantjatjara	4	4	1	611	25	50	25	25	1
English	5	5	1	766	25	60	25	35	1.4
Pitjantjatjara	5	5	1	795	25	60	25	35	1.4
English	1	6	1	1248	30	25	25	5	0.2
Pitjantjatjara	1	6	1	788	30	25	25	5	0.2
English	2	7	1	2222	50	45	45	5	0.111111
Pitjantjatjara	2	7	1	1144	50	45	45	5	0.111111
English	3	8	1	1058	50	30	30	20	0.666667
Pitjantjatjara	3	8	1	678	50	30	30	20	0.666667
English	4	9	1	876	50	25	25	25	1
Pitjantjatjara	4	9	1	778	50	25	25	25	1
English	5	10	1	1727	60	25	25	35	1.4
Pitjantjatjara	5	10	1	867	60	25	25	35	1.4
English	1	1	2	2079	25	30	25	5	0.2
Pitjantjatjara	1	1	2	1707	25	30	25	5	0.2
English	2	2	2	2355	45	50	45	5	0.111111
Pitjantjatjara	2	2	2	978	45	50	45	5	0.111111
English	3	3	2	851	30	50	30	20	0.666667
Pitjantjatjara	3	3	2	637	30	50	30	20	0.666667
English	4	4	2	893	25	50	25	25	1
Pitjantjatjara	4	4	2	701	25	50	25	25	1
English	5	5	2	964	25	60	25	35	1.4
Pitjantjatjara	5	5	2	711	25	60	25	35	1.4
English	1	6	2	1620	30	25	25	5	0.2
Pitjantjatjara	1	6	2	942	30	25	25	5	0.2
English	2	7	2	917	50	45	45	5	0.111111
Pitjantjatjara	2	7	2	864	50	45	45	5	0.111111
English	3	8	2	1300	50	30	30	20	0.666667
Pitjantjatjara	3	8	2	692	50	30	30	20	0.666667
English	4	9	2	2451	50	25	25	25	1
Pitjantjatjara	4	9	2	854	50	25	25	25	1
English	5	10	2	1479	60	25	25	35	1.4
Pitjantjatjara	5	10	2	1249	60	25	25	35	1.4
English	1	1	5	587	25	30	25	5	0.2
Pitjantjatjara	1	1	5	1461	25	30	25	5	0.2
English	2	2	5	494	45	50	45	5	0.111111
Pitjantjatjara	2	2	5	2975	45	50	45	5	0.111111
English	3	3	5	633	30	50	30	20	0.666667
Pitjantjatjara	3	3	5	735	30	50	30	20	0.666667
English	4	4	5	1806	25	50	25	25	1
Pitjantjatjara	4	4	5	615	25	50	25	25	1
English	5	5	5	1591	25	60	25	35	1.4
Pitjantjatjara	5	5	5	733	25	60	25	35	1.4
English	1	6	5	489	30	25	25	5	0.2
Pitjantjatjara	1	6	5	1024	30	25	25	5	0.2
English	2	7	5	594	50	45	45	5	0.111111
Pitjantjatjara	2	7	5	737	50	45	45	5	0.111111
English	3	8	5	8201	50	30	30	20	0.666667
Pitjantjatjara	3	8	5	592	50	30	30	20	0.666667
English	4	9	5	653	50	25	25	25	1
Pitjantjatjara	4	9	5	5980	50	25	25	25	1
English	5	10	5	750	60	25	25	35	1.4
Pitjantjatjara	5	10	5	554	60	25	25	35	1.4
English	1	1	6	879	25	30	25	5	0.2
Pitjantjatjara	1	1	6	1965	25	30	25	5	0.2
English	2	2	6	1234	45	50	45	5	0.111111
Pitjantjatjara	2	2	6	1188	45	50	45	5	0.111111
English	3	3	6	707	30	50	30	20	0.666667
Pitjantjatjara	3	3	6	560	30	50	30	20	0.666667
English	4	4	6	649	25	50	25	25	1
Pitjantjatjara	4	4	6	582	25	50	25	25	1
English	5	5	6	1524	25	60	25	35	1.4
Pitjantjatjara	5	5	6	566	25	60	25	35	1.4
English	1	6	6	2577	30	25	25	5	0.2
Pitjantjatjara	1	6	6	993	30	25	25	5	0.2
English	2	7	6	1203	50	45	45	5	0.111111
Pitjantjatjara	2	7	6	541	50	45	45	5	0.111111
English	3	8	6	635	50	30	30	20	0.666667
Pitjantjatjara	3	8	6	834	50	30	30	20	0.666667
English	4	9	6	606	50	25	25	25	1
Pitjantjatjara	4	9	6	581	50	25	25	25	1
English	5	10	6	540	60	25	25	35	1.4
Pitjantjatjara	5	10	6	643	60	25	25	35	1.4
English	1	1	7	675	25	30	25	5	0.2
Pitjantjatjara	1	1	7	1108	25	30	25	5	0.2
English	2	2	7	1568	45	50	45	5	0.111111
Pitjantjatjara	2	2	7	547	45	50	45	5	0.111111
English	3	3	7	647	30	50	30	20	0.666667
Pitjantjatjara	3	3	7	523	30	50	30	20	0.666667
English	4	4	7	598	25	50	25	25	1
Pitjantjatjara	4	4	7	458	25	50	25	25	1
English	5	5	7	469	25	60	25	35	1.4
Pitjantjatjara	5	5	7	527	25	60	25	35	1.4
English	1	6	7	1030	30	25	25	5	0.2
Pitjantjatjara	1	6	7	466	30	25	25	5	0.2
English	2	7	7	916	50	45	45	5	0.111111
Pitjantjatjara	2	7	7	1690	50	45	45	5	0.111111
English	3	8	7	1382	50	30	30	20	0.666667
Pitjantjatjara	3	8	7	780	50	30	30	20	0.666667
English	4	9	7	531	50	25	25	25	1
Pitjantjatjara	4	9	7	704	50	25	25	25	1
English	5	10	7	483	60	25	25	35	1.4
Pitjantjatjara	5	10	7	463	60	25	25	35	1.4
English	1	1	10	1520	25	30	25	5	0.2
Pitjantjatjara	1	1	10	1851	25	30	25	5	0.2
English	2	2	10	1791	45	50	45	5	0.111111
Pitjantjatjara	2	2	10	4469	45	50	45	5	0.111111
English	3	3	10	843	30	50	30	20	0.666667
Pitjantjatjara	3	3	10	1084	30	50	30	20	0.666667
English	4	4	10	803	25	50	25	25	1
Pitjantjatjara	4	4	10	1463	25	50	25	25	1
English	5	5	10	797	25	60	25	35	1.4
Pitjantjatjara	5	5	10	1135	25	60	25	35	1.4
English	1	6	10	1762	30	25	25	5	0.2
Pitjantjatjara	1	6	10	1979	30	25	25	5	0.2
English	2	7	10	1687	50	45	45	5	0.111111
Pitjantjatjara	2	7	10	2687	50	45	45	5	0.111111
English	3	8	10	877	50	30	30	20	0.666667
Pitjantjatjara	3	8	10	1132	50	30	30	20	0.666667
English	4	9	10	696	50	25	25	25	1
Pitjantjatjara	4	9	10	888	50	25	25	25	1
English	5	10	10	889	60	25	25	35	1.4
Pitjantjatjara	5	10	10	1304	60	25	25	35	1.4
English	1	1	12	2063	25	30	25	5	0.2
Pitjantjatjara	1	1	12	1084	25	30	25	5	0.2
English	2	2	12	1500	45	50	45	5	0.111111
Pitjantjatjara	2	2	12	2664	45	50	45	5	0.111111
English	3	3	12	481	30	50	30	20	0.666667
Pitjantjatjara	3	3	12	556	30	50	30	20	0.666667
English	4	4	12	485	25	50	25	25	1
Pitjantjatjara	4	4	12	4036	25	50	25	25	1
English	5	5	12	422	25	60	25	35	1.4
Pitjantjatjara	5	5	12	651	25	60	25	35	1.4
English	1	6	12	1085	30	25	25	5	0.2
Pitjantjatjara	1	6	12	565	30	25	25	5	0.2
English	2	7	12	1047	50	45	45	5	0.111111
Pitjantjatjara	2	7	12	1409	50	45	45	5	0.111111
English	3	8	12	491	50	30	30	20	0.666667
Pitjantjatjara	3	8	12	568	50	30	30	20	0.666667
English	4	9	12	522	50	25	25	25	1
Pitjantjatjara	4	9	12	491	50	25	25	25	1
English	5	10	12	1336	60	25	25	35	1.4
Pitjantjatjara	5	10	12	457	60	25	25	35	1.4
English	1	1	13	906	25	30	25	5	0.2
Pitjantjatjara	1	1	13	942	25	30	25	5	0.2
English	2	2	13	819	45	50	45	5	0.111111
Pitjantjatjara	2	2	13	1195	45	50	45	5	0.111111
English	3	3	13	729	30	50	30	20	0.666667
Pitjantjatjara	3	3	13	920	30	50	30	20	0.666667
English	4	4	13	820	25	50	25	25	1
Pitjantjatjara	4	4	13	751	25	50	25	25	1
English	5	5	13	911	25	60	25	35	1.4
Pitjantjatjara	5	5	13	589	25	60	25	35	1.4
English	1	6	13	1456	30	25	25	5	0.2
Pitjantjatjara	1	6	13	1721	30	25	25	5	0.2
English	2	7	13	1322	50	45	45	5	0.111111
Pitjantjatjara	2	7	13	2639	50	45	45	5	0.111111
English	3	8	13	917	50	30	30	20	0.666667
Pitjantjatjara	3	8	13	1158	50	30	30	20	0.666667
English	4	9	13	913	50	25	25	25	1
Pitjantjatjara	4	9	13	686	50	25	25	25	1
English	5	10	13	1027	60	25	25	35	1.4
Pitjantjatjara	5	10	13	1016	60	25	25	35	1.4
English	1	1	16	1314	25	30	25	5	0.2
Pitjantjatjara	1	1	16	1123	25	30	25	5	0.2
English	2	2	16	1524	45	50	45	5	0.111111
Pitjantjatjara	2	2	16	1443	45	50	45	5	0.111111
English	3	3	16	1301	30	50	30	20	0.666667
Pitjantjatjara	3	3	16	1021	30	50	30	20	0.666667
English	4	4	16	1011	25	50	25	25	1
Pitjantjatjara	4	4	16	1385	25	50	25	25	1
English	5	5	16	856	25	60	25	35	1.4
Pitjantjatjara	5	5	16	945	25	60	25	35	1.4
English	1	6	16	2000	30	25	25	5	0.2
Pitjantjatjara	1	6	16	1501	30	25	25	5	0.2
English	2	7	16	1876	50	45	45	5	0.111111
Pitjantjatjara	2	7	16	1522	50	45	45	5	0.111111
English	3	8	16	4913	50	30	30	20	0.666667
Pitjantjatjara	3	8	16	925	50	30	30	20	0.666667
English	4	9	16	952	50	25	25	25	1
Pitjantjatjara	4	9	16	1092	50	25	25	25	1
English	5	10	16	998	60	25	25	35	1.4
Pitjantjatjara	5	10	16	879	60	25	25	35	1.4
English	1	1	17	870	25	30	25	5	0.2
Pitjantjatjara	1	1	17	747	25	30	25	5	0.2
English	2	2	17	453	45	50	45	5	0.111111
Pitjantjatjara	2	2	17	1378	45	50	45	5	0.111111
English	3	3	17	411	30	50	30	20	0.666667
Pitjantjatjara	3	3	17	426	30	50	30	20	0.666667
English	4	4	17	621	25	50	25	25	1
Pitjantjatjara	4	4	17	945	25	50	25	25	1
English	5	5	17	396	25	60	25	35	1.4
Pitjantjatjara	5	5	17	364	25	60	25	35	1.4
English	1	6	17	1491	30	25	25	5	0.2
Pitjantjatjara	1	6	17	372	30	25	25	5	0.2
English	2	7	17	704	50	45	45	5	0.111111
Pitjantjatjara	2	7	17	418	50	45	45	5	0.111111
English	3	8	17	395	50	30	30	20	0.666667
Pitjantjatjara	3	8	17	1068	50	30	30	20	0.666667
English	4	9	17	386	50	25	25	25	1
Pitjantjatjara	4	9	17	1372	50	25	25	25	1
English	5	10	17	401	60	25	25	35	1.4
Pitjantjatjara	5	10	17	412	60	25	25	35	1.4
English	1	1	18	3901	25	30	25	5	0.2
Pitjantjatjara	1	1	18	6380	25	30	25	5	0.2
English	2	2	18	2162	45	50	45	5	0.111111
Pitjantjatjara	2	2	18	20060	45	50	45	5	0.111111
English	3	3	18	2209	30	50	30	20	0.666667
Pitjantjatjara	3	3	18	2102	30	50	30	20	0.666667
English	4	4	18	1192	25	50	25	25	1
Pitjantjatjara	4	4	18	2994	25	50	25	25	1
English	5	5	18	3421	25	60	25	35	1.4
Pitjantjatjara	5	5	18	1563	25	60	25	35	1.4
English	1	6	18	2676	30	25	25	5	0.2
Pitjantjatjara	1	6	18	1201	30	25	25	5	0.2
English	2	7	18	2306	50	45	45	5	0.111111
Pitjantjatjara	2	7	18	5039	50	45	45	5	0.111111
English	3	8	18	1972	50	30	30	20	0.666667
Pitjantjatjara	3	8	18	1471	50	30	30	20	0.666667
English	4	9	18	958	50	25	25	25	1
Pitjantjatjara	4	9	18	2900	50	25	25	25	1
English	5	10	18	2498	60	25	25	35	1.4
Pitjantjatjara	5	10	18	5212	60	25	25	35	1.4
English	1	1	19	1880	25	30	25	5	0.2
Pitjantjatjara	1	1	19	886	25	30	25	5	0.2
English	2	2	19	1276	45	50	45	5	0.111111
Pitjantjatjara	2	2	19	538	45	50	45	5	0.111111
English	3	3	19	1851	30	50	30	20	0.666667
Pitjantjatjara	3	3	19	525	30	50	30	20	0.666667
English	4	4	19	1234	25	50	25	25	1
Pitjantjatjara	4	4	19	895	25	50	25	25	1
English	5	5	19	1748	25	60	25	35	1.4
Pitjantjatjara	5	5	19	2445	25	60	25	35	1.4
English	1	6	19	5127	30	25	25	5	0.2
Pitjantjatjara	1	6	19	1348	30	25	25	5	0.2
English	2	7	19	933	50	45	45	5	0.111111
Pitjantjatjara	2	7	19	1147	50	45	45	5	0.111111
English	3	8	19	786	50	30	30	20	0.666667
Pitjantjatjara	3	8	19	589	50	30	30	20	0.666667
English	4	9	19	4708	50	25	25	25	1
Pitjantjatjara	4	9	19	510	50	25	25	25	1
English	5	10	19	1375	60	25	25	35	1.4
Pitjantjatjara	5	10	19	454	60	25	25	35	1.4
English	1	1	20	524	25	30	25	5	0.2
Pitjantjatjara	1	1	20	455	25	30	25	5	0.2
English	2	2	20	868	45	50	45	5	0.111111
Pitjantjatjara	2	2	20	668	45	50	45	5	0.111111
English	3	3	20	437	30	50	30	20	0.666667
Pitjantjatjara	3	3	20	555	30	50	30	20	0.666667
English	4	4	20	431	25	50	25	25	1
Pitjantjatjara	4	4	20	418	25	50	25	25	1
English	5	5	20	389	25	60	25	35	1.4
Pitjantjatjara	5	5	20	464	25	60	25	35	1.4
English	1	6	20	721	30	25	25	5	0.2
Pitjantjatjara	1	6	20	520	30	25	25	5	0.2
English	2	7	20	724	50	45	45	5	0.111111
Pitjantjatjara	2	7	20	382	50	45	45	5	0.111111
English	3	8	20	529	50	30	30	20	0.666667
Pitjantjatjara	3	8	20	479	50	30	30	20	0.666667
English	4	9	20	464	50	25	25	25	1
Pitjantjatjara	4	9	20	582	50	25	25	25	1
English	5	10	20	440	60	25	25	35	1.4
Pitjantjatjara	5	10	20	492	60	25	25	35	1.4
English	1	1	23	3627	25	30	25	5	0.2
Pitjantjatjara	1	1	23	2358	25	30	25	5	0.2
English	2	2	23	1649	45	50	45	5	0.111111
Pitjantjatjara	2	2	23	531	45	50	45	5	0.111111
English	3	3	23	632	30	50	30	20	0.666667
Pitjantjatjara	3	3	23	595	30	50	30	20	0.666667
English	4	4	23	1074	25	50	25	25	1
Pitjantjatjara	4	4	23	774	25	50	25	25	1
English	5	5	23	616	25	60	25	35	1.4
Pitjantjatjara	5	5	23	832	25	60	25	35	1.4
English	1	6	23	1322	30	25	25	5	0.2
Pitjantjatjara	1	6	23	950	30	25	25	5	0.2
English	2	7	23	1413	50	45	45	5	0.111111
Pitjantjatjara	2	7	23	1502	50	45	45	5	0.111111
English	3	8	23	696	50	30	30	20	0.666667
Pitjantjatjara	3	8	23	742	50	30	30	20	0.666667
English	4	9	23	2710	50	25	25	25	1
Pitjantjatjara	4	9	23	604	50	25	25	25	1
English	5	10	23	772	60	25	25	35	1.4
Pitjantjatjara	5	10	23	663	60	25	25	35	1.4
English	1	1	25	691	25	30	25	5	0.2
Pitjantjatjara	1	1	25	558	25	30	25	5	0.2
English	2	2	25	1069	45	50	45	5	0.111111
Pitjantjatjara	2	2	25	935	45	50	45	5	0.111111
English	3	3	25	552	30	50	30	20	0.666667
Pitjantjatjara	3	3	25	536	30	50	30	20	0.666667
English	4	4	25	461	25	50	25	25	1
Pitjantjatjara	4	4	25	455	25	50	25	25	1
English	5	5	25	679	25	60	25	35	1.4
Pitjantjatjara	5	5	25	1407	25	60	25	35	1.4
English	1	6	25	1626	30	25	25	5	0.2
Pitjantjatjara	1	6	25	1162	30	25	25	5	0.2
English	2	7	25	2386	50	45	45	5	0.111111
Pitjantjatjara	2	7	25	479	50	45	45	5	0.111111
English	3	8	25	905	50	30	30	20	0.666667
Pitjantjatjara	3	8	25	479	50	30	30	20	0.666667
English	4	9	25	626	50	25	25	25	1
Pitjantjatjara	4	9	25	629	50	25	25	25	1
English	5	10	25	516	60	25	25	35	1.4
Pitjantjatjara	5	10	25	516	60	25	25	35	1.4
English	1	1	26	1679	25	30	25	5	0.2
Pitjantjatjara	1	1	26	1214	25	30	25	5	0.2
English	2	2	26	4044	45	50	45	5	0.111111
Pitjantjatjara	2	2	26	2691	45	50	45	5	0.111111
English	3	3	26	1326	30	50	30	20	0.666667
Pitjantjatjara	3	3	26	2236	30	50	30	20	0.666667
English	4	4	26	1257	25	50	25	25	1
Pitjantjatjara	4	4	26	1071	25	50	25	25	1
English	5	5	26	1213	25	60	25	35	1.4
Pitjantjatjara	5	5	26	1417	25	60	25	35	1.4
English	1	6	26	2901	30	25	25	5	0.2
Pitjantjatjara	1	6	26	2085	30	25	25	5	0.2
English	2	7	26	3025	50	45	45	5	0.111111
Pitjantjatjara	2	7	26	1707	50	45	45	5	0.111111
English	3	8	26	1563	50	30	30	20	0.666667
Pitjantjatjara	3	8	26	3050	50	30	30	20	0.666667
English	4	9	26	1803	50	25	25	25	1
Pitjantjatjara	4	9	26	1271	50	25	25	25	1
English	5	10	26	1354	60	25	25	35	1.4
Pitjantjatjara	5	10	26	1581	60	25	25	35	1.4
